# Supplementary material for: The Maternal Effect Genes UTX and JMJD3 Play Contrasting Roles in Mus musculus Preimplantation Embryo Development
Source: PubMed Central journal article supplement (PMC4935995; doi:10.1038/srep26711), 2016-07-07
Supplement: srep26711-s3.pdf [file srep26711-s3.pdf]

**The Maternal Effect Genes UTX and JMJD3 Play Contrasting Roles in  
*Mus musculus* Preimplantation Embryo Development**

Lei Yang<sup>1</sup>, Li-Shuang Song<sup>1</sup>, Xue-Fei Liu<sup>1</sup>, Qing Xia<sup>2</sup>, Li-Ge Bai<sup>1</sup>, Li Gao<sup>1</sup>, Guang-Qi Gao<sup>1</sup>, Yu Wang<sup>3</sup>, Zhu-Ying Wei<sup>1</sup>, Chun-Ling Bai<sup>1</sup>, and Guang-Peng Li<sup>1,\*</sup>

<sup>1</sup>The Key Laboratory of the National Education Ministry for Mammalian Reproductive Biology and Biotechnology, Inner Mongolia University, Hohhot, People's Republic of China.

<sup>2</sup> State Key Laboratory of Natural and Biomimetic Drugs, Department of Chemical Biology, School of Pharmaceutical Sciences, Peking University, Beijing, People's Republic of China.

<sup>3</sup> Department of Gynecology and Obstetrics, Inner Mongolia Medical University Affiliated Hospital, Hohhot, People's Republic of China.

\* Correspondence and requests for materials should be addressed to Guang-Peng Li (Email: gpengli@imu.edu.cn)

Supplement figure:

**A**

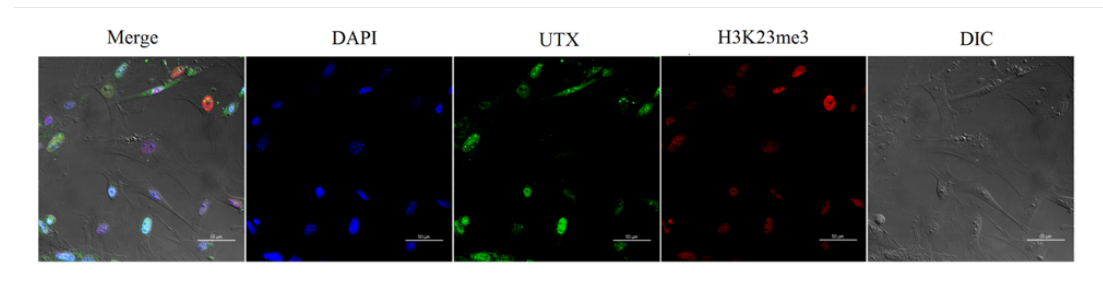

**B**

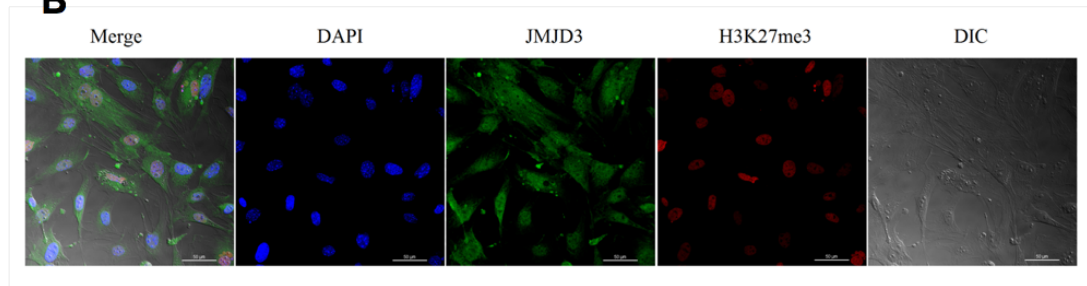

Figure s1. Immunostaining analysis for UTX (A) or JMJD3 (B) in mouse embryonic fibroblast cell. *Scale bar*, 50  $\mu$ m.

### Supplement movie:

To detect embryo quality by means of Oct4 promoter-driven GFP, we injected control-siRNA (Supplementary Movie1) or siRNA-JMJD3 (Supplementary Movie2) into OG2 (Oct4-GFP transgenic) parthenogenetic embryos and imaged via live-cell workstation. Compared with the control group, the GFP fluorescence signals significantly enhanced in the oocytes injected with JMJD3 siRNA.
